# Supplementary material
Source: publisher figshare collection journal article supplement (https://frontiersin.figshare.com/ndownloader/files/13319540)
Supplement: Supplementary file [file 13319540]

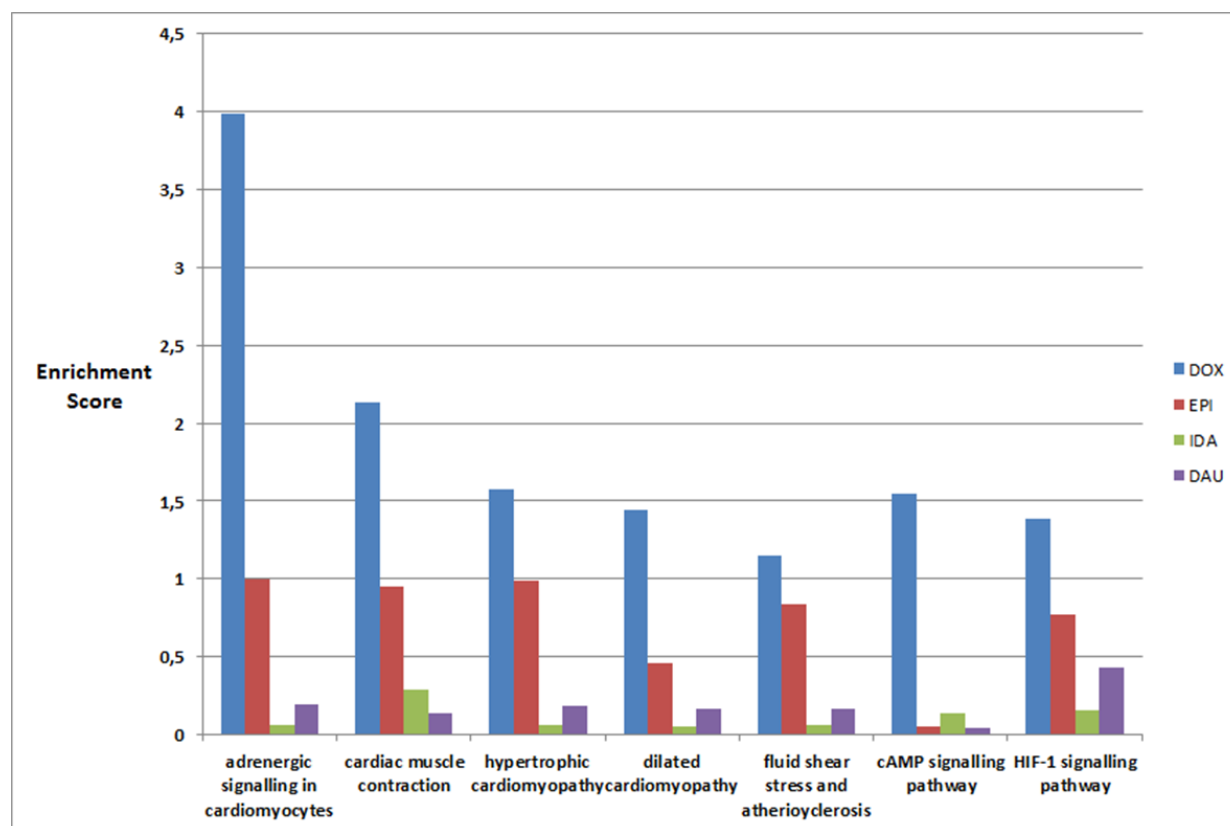

**Supplementary Figure 4:** Enrichment score ( $-\log_{10}(\text{Q-value})$ ) of heart disease pathways annotated by KEGG with the DEGs from DOX, EPI, IDA and DAU treatment vs. untreated rat hearts. Q-value is computed from a hypergeometric distribution and FDR correction.
